# Supplementary material for: Integrated Analysis Reveals the Targets and Mechanisms in Immunosuppressive Effect of Mesalazine on Ulcerative Colitis
Source: Front Nutr. 2022 May 19;9:867692. doi: 10.3389/fnut.2022.867692 (PMC9161553; doi:10.3389/fnut.2022.867692)
Supplement: Supplementary file 5 [file Table_1.xlsx]

## Sheet: Sheet1
Order	log2 fold change (DSS/Ctrl)	wilcoxt test p-value	regulation (DSS/Ctrl)		log2 fold change (DSS+mesalazine/DSS)	wilcoxt test p-value	regulation (DSS+mesalazine/DSS)
Anaeroplasmatales	2.89	0.0278	up		-0.68	0.3472	down
Bacteroidales	-1.44	0.009	down		0.13	0.754	up
Betaproteobacteriales	-2.48	0.009	down		2.38	0.0472	up
Coriobacteriales	-3.78	0.009	down		2.44	0.0283	up
Enterobacteriales	6.6	0.0163	up		-3.54	0.0758	down
Firmicutes	3.15	0.009	up		-0.15	0.9168	down
Lactobacillales	2.19	0.015	up		3.29	0.1745	up
Saccharimonadales	-1.86	0.0472	down		0.3	0.4647	up
Verrucomicrobiales	9.63	0.009	up		-0.29	0.2506	down
